# Supplementary material
Source: publisher figshare collection journal article supplement (https://gsajournals.figshare.com/ndownloader/files/17710067)
Supplement: Supplementary file 1 [file 17710067]

## Sheet: Sheet1 (2)
Table S1. Information of the mutant lines used in this study
Mutant ID	Original cultivar	Rradition	Generation	Mutation phenotype
HTM_G347	Hitomebore	Gamma ray, dose rate 10Gy/h, 250Gy	M6	Semi-dwarf, leaf blight
HTM_G348	Hitomebore	Gamma ray, dose rate 10Gy/h, 250Gy	M6	Narrow leaf, dwarf, low fertility
HTM_G349	Hitomebore	Gamma ray, dose rate 10Gy/h, 250Gy	M6	Dwarf, low fertility
HTM_G351	Hitomebore	Gamma ray, dose rate 10Gy/h, 250Gy	M6	Narrow leaf, low fertility
HTM_G353	Hitomebore	Gamma ray, dose rate 10Gy/h, 250Gy	M6	Slightly low rate of panicle seed setting
HTM_G354	Hitomebore	Gamma ray, dose rate 10Gy/h, 250Gy	M6	Slightly low rate of panicle seed setting
HTM_G355	Hitomebore	Gamma ray, dose rate 10Gy/h, 250Gy	M6	Narrow leaf, dwarf, low fertility
HTM_I154	Hitomebore	220MeV carbon ion (LET 107KeV/μm), 30Gy	M6	Semi-dwarf, low fertility
HTM_I218	Hitomebore	220MeV carbon ion (LET 107KeV/μm), 30Gy	M6	Dwarf, stripe, low fertility
HTM_I223	Hitomebore	220MeV carbon ion (LET 107KeV/μm), 30Gy	M6	Narrow leaf, dwarf, low tillering
HTM_I224	Hitomebore	220MeV carbon ion (LET 107KeV/μm), 30Gy	M6	Leaf lesion mimic, semi-dwarf, low rate of panicle seed setting, low tillering
HTM_I226	Hitomebore	220MeV carbon ion (LET 107KeV/μm), 30Gy	M6	Semi-dwarf, extremly low fertility
HTM_I227	Hitomebore	220MeV carbon ion (LET 107KeV/μm), 30Gy	M6	Semi-dwarf, early heading
HTM_I257	Hitomebore	220MeV carbon ion (LET 107KeV/μm), 30Gy	M6	Dwarf, low fertility
